# Supplementary material for: Lignin promoted the fast formation of a robust and highly conductive deep eutectic solvent ionic gel at room temperature for a flexible quasi-solid-state supercapacitor and strain sensors
Source: Royal Society of Chemistry journal article supplement (doi:10.1039/d1gc01512e), 2021-01-01
Supplement: d1gc01512e1.pdf [file d1gc01512e1.pdf]

Supporting materials for:

**Lignin Promoted the Fast Formation of Robust and Highly Conductive Deep  
Eutectic Solvent Ionic Gel at Room Temperature for Flexible Quasi-Solid-State  
Supercapacitor and Strain Sensors**

*Jiake Wang, Yongqi Deng, Zhongzheng Ma, Yan Wang, Shangzhong Zhang, Lifeng*

*Yan\**

CAS Key Laboratory of Soft Matter Chemistry, Hefei National Laboratory for  
Physical Sciences at the Microscale, and Department of Chemical Physics, iCHEM,  
University of Science and Technology of China. Hefei, 230026, P.R.China.

Corresponding author: Lifeng Yan, Fax/Tel: +86-551-63606853; E-mail:  
lfyan@ustc.edu.cn



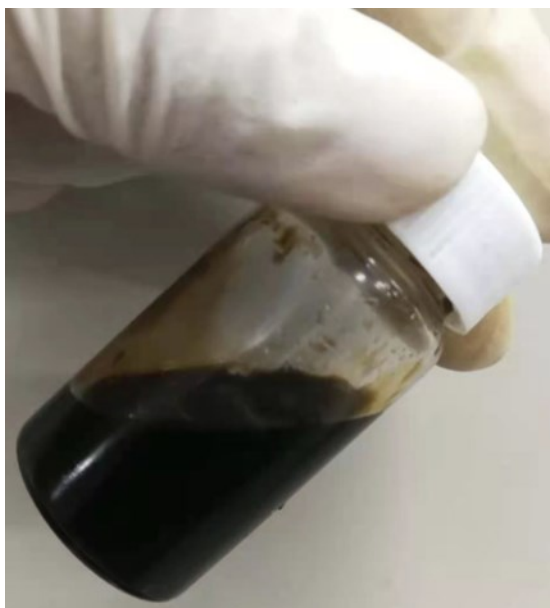

**Figure S1.** Digital photo after reaction without lignin.

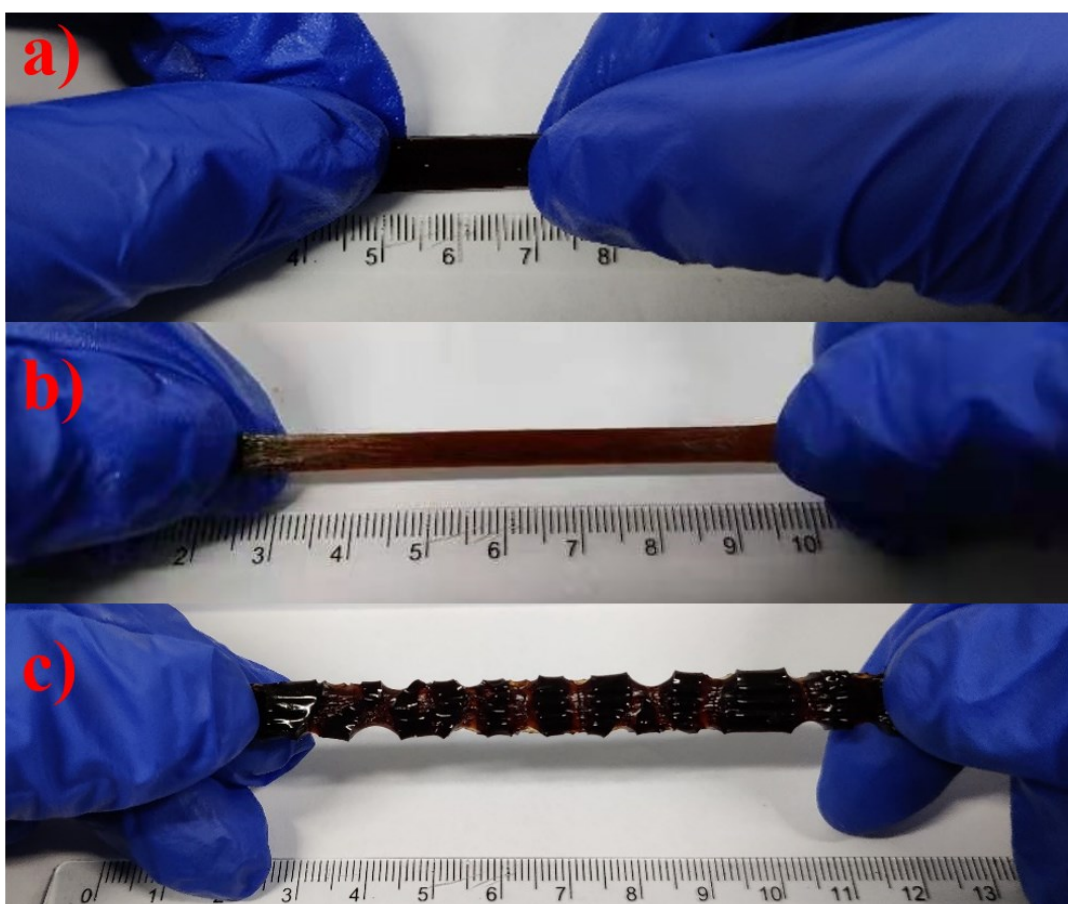

**Figure S2.** Digital photos of DGe-Fe<sub>1</sub>L<sub>0.5</sub> before stretching (a) and after stretching (b),

c) Digital photos of DGe-Fe<sub>1</sub>L<sub>1.5</sub> after stretching.



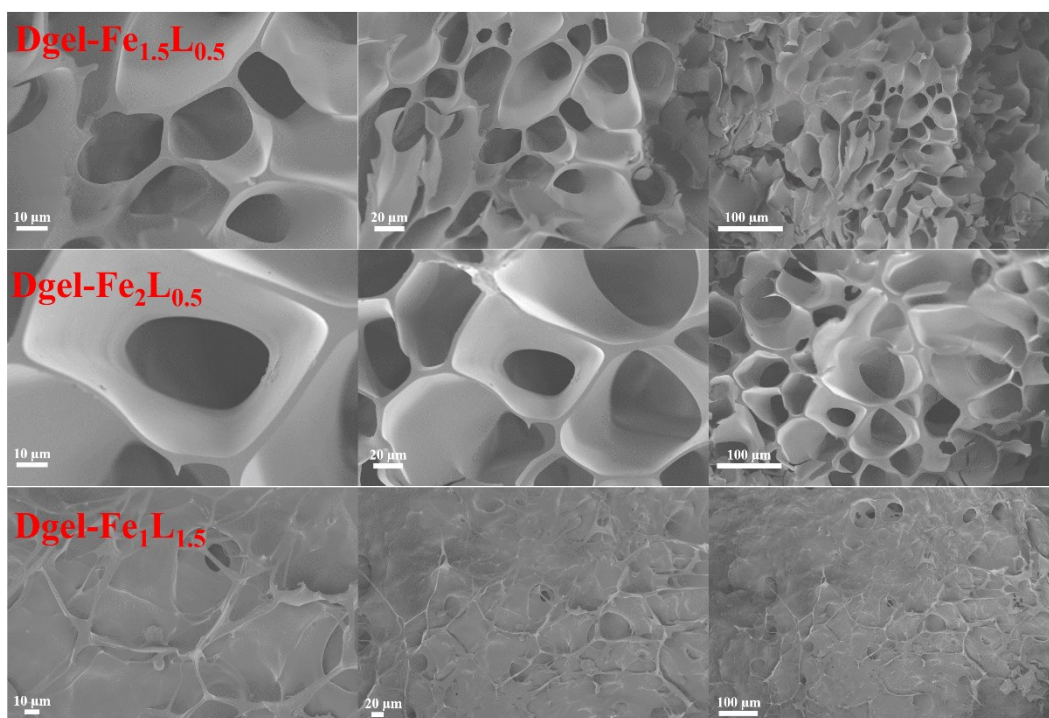

**Figure S3.** SEM of DES gel with different lignin and  $\text{Fe}_2(\text{SO}_4)_3$  contents.

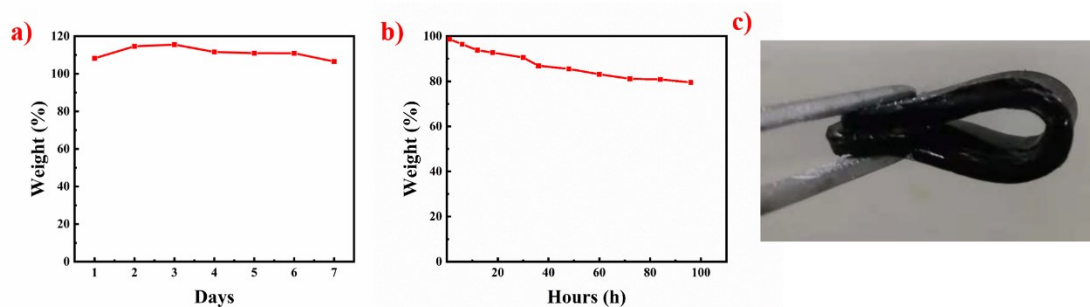

**Figure S4.** The weight change of the gel after being placed in the air (a) and in the 80 °C oven (b), c) Flexibility test after the gel was placed in the oven for 96 hours



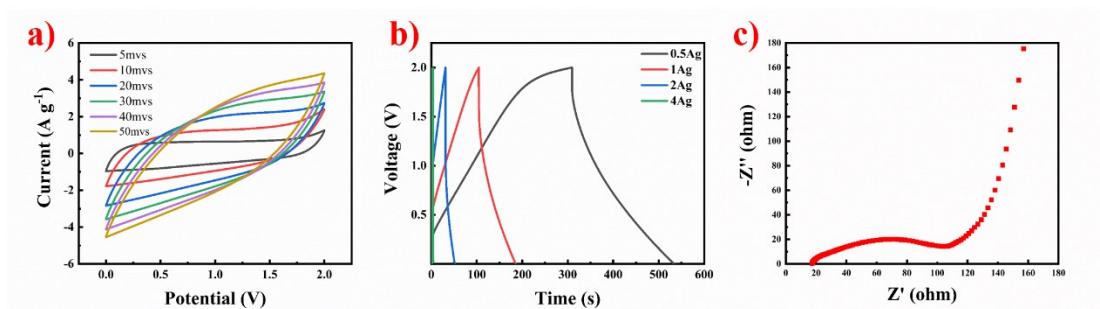

**Figure S5.** Electrochemical performance of supercapacitors after adding potassium acetate.

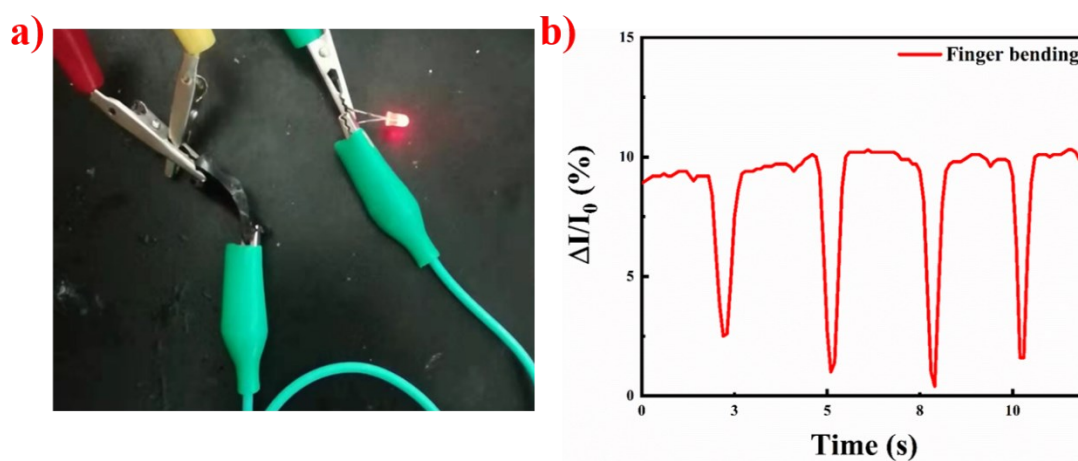

**Figure S6.** Conductivity and sensing performance of gel at -20 °C.
